# Effects of Endotoxin and Psychological Stress on Redox Physiology, Immunity and Feather Corticosterone in Greenfinches

Richard Meitern<sup>1</sup>, Elin Sild<sup>1,2</sup>, Mari-Ann Lind<sup>1</sup>, Marju Männiste<sup>1</sup>, Tuul Sepp<sup>1</sup>, Ulvi Karu<sup>1</sup>, Peeter Hõrak<sup>1\*</sup>

<sup>1</sup> Department of Zoology, Institute of Ecology and Earth Sciences, Tartu University, Tartu, Estonia,, <sup>2</sup> Molecular Ecology and Evolution Lab, Department of Biology, Lund University, Lund, Sweden

## Abstract

Assessment of costs accompanying activation of immune system and related neuroendocrine pathways is essential for understanding the selective forces operating on these systems. Here we attempted to detect such costs in terms of disruption to redox balance and interference between different immune system components in captive wild-caught greenfinches (*Carduelis chloris*). Study birds were subjected to an endotoxin-induced inflammatory challenge and temporary exposure to a psychological stressor (an image of a predator) in a 2\*2 factorial experiment. Injection of bacterial endotoxin resulted in up-regulation of two markers of antioxidant protection – erythrocyte glutathione, and plasma oxygen radical absorbance (OXY). These findings suggest that inflammatory responses alter redox homeostasis. However, no effect on markers of oxidative damage to proteins or DNA in erythrocytes could be detected. We found no evidence that the endotoxin injection interfered with antibody production against *Brucella abortus* antigen or the intensity of chronic coccidiosis. The hypothesis of within-immune system trade-offs as a cost of immunity was thus not supported in our model system. We showed for the first time that administration of endotoxin can reduce the level of corticosterone deposited into feathers. This finding suggests a down-regulation of the corticosterone secretion cascade due to an endotoxin-induced immune response, a phenomenon that has not been reported previously. Exposure to the predator image did not affect any of the measured physiological parameters.

**Citation:** Meitern R, Sild E, Lind M-A, Männiste M, Sepp T, et al. (2013) Effects of Endotoxin and Psychological Stress on Redox Physiology, Immunity and Feather Corticosterone in Greenfinches. PLoS ONE 8(6): e67545. doi:10.1371/journal.pone.0067545

**Editor:** Nicola Saino, University of Milan, Italy

**Received:** January 29, 2013; **Accepted:** May 20, 2013; **Published:** June 21, 2013

**Copyright:** © 2013 Meitern et al. This is an open-access article distributed under the terms of the Creative Commons Attribution License, which permits unrestricted use, distribution, and reproduction in any medium, provided the original author and source are credited.

**Funding:** The study was financed by Estonian Science Foundation grants #7737, the Estonian Ministry of Education and Science (target-financing project #0180004s09) and by the European Union through the European Regional Development Fund (Centre of Excellence FIBIR). The funders had no role in study design, data collection and analysis, decision to publish, or preparation of the manuscript.

**Competing Interests:** The authors have declared that no competing interests exist.

\* E-mail: horak@ut.ee

## Introduction

Virtually all organisms are exposed to a wide range of potential pathogens and thus have evolved complex physiological responses, including innate and acquired immunity, to resist and eliminate infections [1]. However, using the immune system can be costly, as revealed by studies demonstrating adverse effects of immune defence activation on different components of fitness and various physiological indicators of well-being in hosts [2–5]. Assessment of such costs is essential for understanding the selective forces operating on immune responses [6–8].

The costs of using immune responses can be roughly divided into energetic [7], immunopathological [9] and those resulting from cross-regulation between different components of the immune system, such that responses against one type of pathogen render a host susceptible to other types of pathogen [10,11]. The current study focuses on the two latter types of cost in relation to endotoxin-induced inflammatory response in captive wild-caught greenfinches (*Carduelis chloris*).

Immunopathology, the damage to a host caused by immune responses *per se*, is implicated in the severity of many of the world's major human diseases; however, its role in wild animal diseases has been little studied [12]. One of the most potent sources of

pathological damage exerted by the immune system upon its host is the production of reactive oxygen and nitrogen species by phagocytic cells during an inflammatory response [6,12]. These reactive species are not pathogen-specific and can also damage the host if its protective and/or repair functions are compromised or fail. This may cause oxidative stress (OS), defined here as 'a disturbance in the pro-oxidant/antioxidant balance in favour of the oxidants, leading to a disruption of redox signalling and control and/or molecular damage' [13]. However, despite OS being regularly cited as a major cause of immunopathology [12], evidence for the claim appears contradictory [14].

Cross-regulation between different components of the immune system is another important source of immunity costs and may also relate to generation of immunopathological damage [11]. To date, most of the evidence concerning trade-offs between different components of the immune system in the context of immunoeological research originates from studies of mammals [15]. Evidence for similar patterns in birds has started to accumulate but originates mostly from studies of poultry [16,17] (but see [18,19]).

An ecologically relevant method for examining physiological tradeoffs within the immune system is to compare the responses of stressed and unstressed animals [20]. Stress, defined here as a 'physiological and behavioural state engaged to endure, avoid, or

recover from an aversive stimulus or condition' [21] is tightly integrated with immune function in vertebrates. Some components of immune responses are enhanced when confronted by certain acute stressors, such as encounters with predators or aggressive conspecifics, in order to prepare an organism for potential invasion of pathogenic microbes in the case of wounding [22]. However, other types of stressors and chronic stress in general rather appear immunosuppressive [21,23,24].

To study the effects of immune system activation on parameters of oxidative status and other components of immunity, we performed an experiment with 66 wild-caught captive greenfinches. We adopted the approach of inducing an inflammatory response by administering bacterial lipopolysaccharide (LPS), which is used as a model to mimic OS associated with injury and disease in biomedicine and poultry science [25] but also increasingly in ecological studies [26]. In a 2\*2 factorial design, approximately half of the birds were injected with LPS and/or temporarily exposed to an image of a predator in order to impose psychological stress. We then assessed two markers of antioxidant protection (Total Antioxidant Capacity, TAC, and Oxygen Radical Absorbance, OXY), individual antioxidants (glutathione and uric acid) and two indicators of oxidative damage (protein carbonyls, a marker of protein oxidation, and DNA damage, assessed in single cell gel electrophoresis - comet assay). We also recorded the effects of treatments on body mass and total plasma protein content as indicators of general physiological condition. To assess the effects of treatments on parameters of immune function, we monitored changes in chronic coccidian infection intensity and antibody production in response to immunisation with *Brucella abortus* (BA) antigen. In order to assess the potentially stressful effects of both treatments on our study objects, we measured the corticosterone content of tail feathers grown during the experiment.

We predicted that (1) if induction of inflammatory response causes oxidative stress, we should detect higher levels of oxidative damage among LPS-injected birds as compared to saline-injected controls on the basis of elevated protein carbonyls and DNA damage. Similarly, we anticipated that (2) exposure to a stressful stimulus (an image of a predator) might induce oxidative damage [27,28–30]. (3) If higher levels of antioxidant capacity and individual antioxidants reflect beneficial redox state, these should decrease in LPS and predator-image-exposed birds. Alternatively, if LPS injection induces OS that leads to protective up-regulation of antioxidant defences, antioxidant levels may increase in response to LPS and stress treatments [31,32]. (4) We had no directional predictions with respect of the effects of LPS injection on our measures of immunity. Assuming that mounting an inflammatory response to LPS usurps resources that could be invested into other components of immunity [33], one might expect LPS treatment to reduce the antibody response to BA and increase the intensity of chronic coccidiosis. On the other hand, synergistic interactions between different immune system components are also possible [34,35], such that priming an immune system with LPS might also potentiate immune responses to other antigens [36]. We predicted that (5) total plasma protein levels should increase in response to immune challenge if synthesis of positive acute phase proteins exceeded protein catabolism [37]. Alternatively, total plasma proteins might decrease due to inflammation-induced catabolism [38]. We further predicted that (6) both treatments would induce a decline in body mass and (7) elevate feather corticosterone due to inflammation- and/or stress-induced secretion of corticosterone [37,39,40]. Finally, we predicted that if the predator image exposure was sufficiently stressful in our model system, (8) all physiological effects of LPS

injection should be boosted among birds exposed to the image [41]. Because physiological responses to immune system activation have been shown to depend on age [42,43], we also tested whether yearling and older greenfinches respond differently to LPS treatments.

## Methods

### Study protocol

Male wild greenfinches were captured in mist-nets at bird feeders in a garden in the city of Tartu, Estonia (58° 22' N; 26° 43' E) on 2nd, 3rd and 9th January 2012. The birds were housed indoors in individual cages (27×51×55 cm) with sand-covered floors in a single room where they had visual contact with their neighbours. The average temperature in the aviary during the experiment was 14.2±1.5 (SD) °C and average humidity was 43±9 (SD)%. The birds were supplied *ad libitum* with sunflower seeds and tap water and were exposed to a natural day-length cycle using artificial lighting by luminophore tubes. They were released back to their natural habitat on 9th March 2012. The study was conducted under license from the Estonian Ministry of the Environment (Licence # 1–4.1/11/100, issued on 23rd March 2011), and the experiment was approved by the Committee of Animal Experiments at the Estonian Ministry of Agriculture (decision # 95, issued on 17th January 2012).

The timeline of the experiment is shown in Fig. 1. The birds were divided into four approximately equal-sized groups on the basis of similar age composition (yearlings vs older, determined on the basis of plumage characteristics) and body mass, recorded on 24 January. The age composition of the treatment groups is given in Table S1. On the evening of the 21<sup>st</sup> day of the experiment (30th January), after the lights had switched off, 31 birds received an injection of 0.1 mg *E. coli* LPS (strain 055:B5, Sigma L2880) in 40 µL sterile isotonic saline into the pectoralis muscle. The dose of LPS was chosen to be identical to that used in a similar experiment in house sparrows (*Passer domesticus*) [44]. The remaining birds (35 individuals) received 40 µL isotonic saline injections.

At the same time, food cups were removed from all cages and cage floors were completely cleaned in order to motivate the birds to feed when presented with a predator image the following morning. In the morning of day 22, the birds were kept without food for 2 h 40 min (the total length of the light period was 9 h 15 min). During the final 10 min of that period, the lights were turned off and the birds received their food cups, filled with approximately equal amount of sunflower seeds. Thirty-two birds (16 LPS-injected and 16 saline-injected) received an image of an owl (Fig. 2) attached to their food cups, as birds are known to be averse to pairs of eyes (e.g., [45]). The photo of *Glaucidium nanum* by Danté Fenolio was obtained from <http://anotheca.com/wordpress/2009/09/02/working-in-chile-to-serve-darwins-frogs/>. Thereafter, the lights were turned on and the exposure of the owl image lasted for 83 min. At that point, the images were removed from the cups, and the birds continued their daily routine until the lights switched off at 17:15. The owl image was obviously perceived by the birds as threatening, as the average latency to feed was more than seven times longer among the image-exposed than the non-exposed birds (28.3±26.8 min vs 3.8±6.4 min;  $z = 4.8$ ,  $P < 0.0001$ , U-test). We chose not to use a non-threatening 'control' image for the birds that were not exposed to the owl image because the aim of the experiment was not to detect a response to a specific predator but to modify the context of physiological and behavioural measurements. From this perspective, there is no difference whether the birds perceived an image as a predator or just as a novel object.

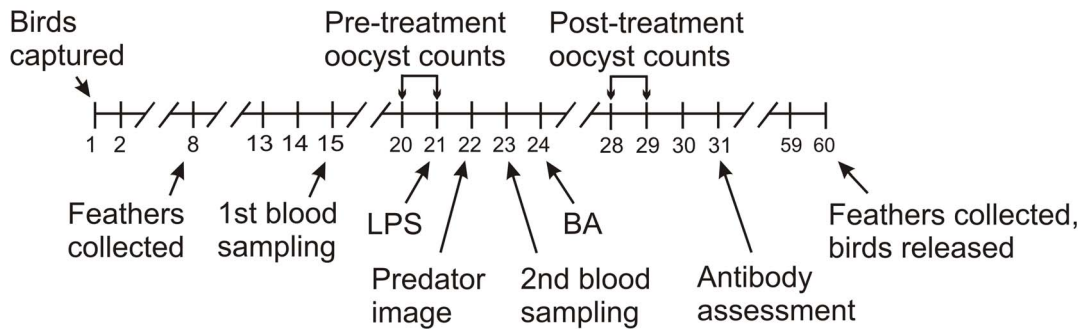

**Figure 1. Timeline of the experiment.** Day 1 = 10th January. 'LPS' and 'BA' stand for bacterial lipopolysaccharide and *Brucella abortus* antigen injection, respectively. 'Predator image' stands for exposing birds to an image of an owl (Fig. 2), mounted on their food cups. doi:10.1371/journal.pone.0067545.g001

Birds were sampled for coccidian (*Isospora* sp.) infection by faecal examination on days 20–21 (pre-treatment oocyst counts) and on days 28–29 (post-treatment oocyst counts). For collection of faecal samples, two sheets of A4 paper were placed on the sand bedding of cages 2 h before the lights turned off. After the lights had turned off, faeces were collected from the papers. Infection intensities were averaged over the pre- and post-treatment period. All birds appeared naturally infected. Infection intensities (number of oocysts per gram of faeces) of individual birds were quantified as described previously [46,47].

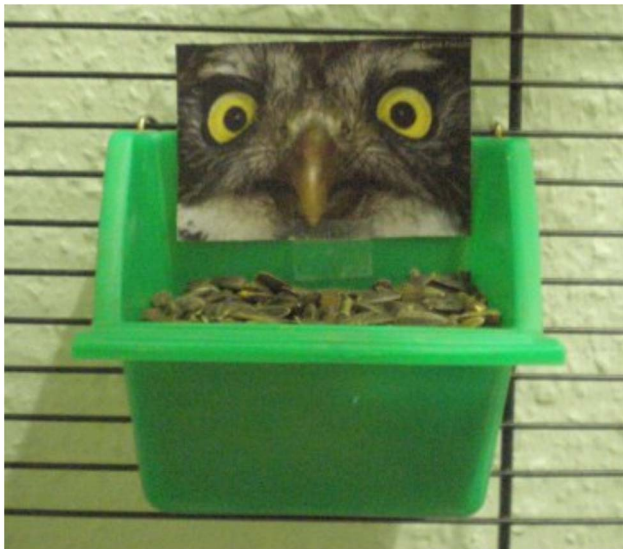

**Figure 2. Image of predator, mounted on the food cup.** On day 24 all of the birds were injected with 40  $\mu$ L of killed *Brucella abortus* (BA) suspension in the pectoralis muscle (serum agglutination test antigen, Strain 99, product code RAA0054, Veterinary Laboratories Agency, Weybridge, UK). All birds were blood sampled on days 15 and 23 in order to record the effects of treatments on haematological parameters and in the morning of day 31 to collect serum samples for determination of anti-BA antibodies. The 38 h period between the LPS injection and the second blood sampling was chosen because we expected that ecologically relevant effects of inflammatory challenge on the studied physiological markers would last longer than one day. Blood sampling of birds took place in the mornings before the lights turned on. Other procedures, including coccidian oocyst collection, maintenance and BA injections, were performed in the evenings after the lights had turned off. doi:10.1371/journal.pone.0067545.g002

### Blood analyses

Concentration of uric acid was determined from 5  $\mu$ L plasma samples using the enzymatic colorimetric test with lipid clearing factor (uric acid liquicolor). Repeatability of uric acid concentration was 0.95 ( $F_{9,10} = 35.7$ ,  $P < 0.0001$ ). Total plasma protein was determined from 5  $\mu$ L samples using the biuret method. Repeatability of total plasma protein concentration was 0.90 ( $F_{9,10} = 19.2$ ,  $P < 0.0001$ ). Both kits were manufactured by Human GmbH (Wiesbaden, Germany).

Plasma Total Antioxidant Capacity (TAC) was measured from 5  $\mu$ L plasma samples according to the method described by Erel [48] with minor modifications as described by Sepp and colleagues [49]. The assay is based on the capacity of antioxidants in the solution to decolorize the ABTS<sup>+</sup> (2, 2-azinobis (3-ethylbenzothiazoline-6-sulfonate)) according to their concentrations and antioxidant capacities. The main contributors to TAC are plasma uric acid and free sulfhydryl groups of proteins [48,49]. The results are quantified in mM Trolox (water soluble vitamin E analogue) equivalents. Repeatability of TAC was 0.96 ( $F_{8,9} = 44.0$ ,  $P < 0.0001$ ) [49].

Plasma Oxygen Radical Absorbance (OXY) was measured using the OXY-adsorbent test (Diacron International, Grosseto, Italy) from 5  $\mu$ L plasma samples, according to the manufacturer's instructions [50]. This test quantifies the ability of the plasma non-enzymatic antioxidant compounds to cope with the *in vitro* oxidant action of hypochlorous acid (HOCl; an endogenously produced oxidant). Concentrations of OXY are expressed as mM of HOCl neutralized. Repeatability of OXY was 0.79 ( $F_{9,10} = 8.3$ ,  $P = 0.0007$ ) [51]. Previous studies in birds, including greenfinches, have shown that OXY does not correlate with TAC [51].

Total glutathione (GSH) levels in erythrocytes were determined within a week after sampling following the approach of Galván and Alonso-Alvarez [52] and Rahman et al. [53] with modifications as previously described [54]. Results are given in  $\mu$ M per gram of pellet. Repeatability of GSH concentration was 0.91 ( $F_{9,10} = 22.1$ ,  $P < 0.0001$ ) [54].

Determination of carbonyl level in proteins is used as an index of the extent of protein oxidative damage. The assay was carried out as previously described [55]. Briefly, after centrifugation, erythrocytes were washed twice with 0.9% sodium chloride and were centrifuged at 6700 g. A 5% erythrocyte suspension in 0.15 M NaCl 10 mM sodium phosphate buffer (pH 7.4) was then stored at  $-20^{\circ}\text{C}$  until 200  $\mu$ L of the haemolysate was mixed with 600  $\mu$ L of 8 mM 2,4-dinitrophenylhydrazine in 3 M HCL. Samples were incubated for 50 min at  $37^{\circ}\text{C}$  in the dark and vortexed every 10 min. 600  $\mu$ L of 25% (w/v) trichloroacetic acid was added to the tube, which was left on ice for 8 min and then

centrifuged for 3 min at 6000 g to collect the protein precipitates. This pellet was washed using 200  $\mu\text{L}$  15% trichloroacetic acid and then washed twice with 800  $\mu\text{L}$  of ethanol-ethyl acetate (1:1), (v/v). The final precipitate was dissolved in 300  $\mu\text{L}$  5M guanidine hydrochloride solution and incubated for 15 min at 37°C with mixing. Any insoluble materials were removed by repeated centrifugation. Carbonyl level was calculated from the peak absorbance of the spectra at 355–390 nm, using an absorption coefficient of 22000  $\text{M}^{-1} \text{cm}^{-1}$ . Results were expressed as  $\mu\text{mol}$  per mg of protein. The protein content of the sample was assessed using the Bio-Rad Protein Assay kit (Bio-Rad Laboratories, Inc., CA, USA) according to the manufacturer's instructions. Repeatability of protein carbonyl concentration was 0.65 ( $F_{51,92} = 6.2$ ,  $P < 0.0001$ ).

The comet assay was performed using the Trevigen Comet Assay kit (Trevigen Inc., Gaithersburg, MD, USA) with modifications in electrophoresis conditions as indicated below. The alkaline version of the assay measures DNA strand breaks and alkali-labile sites, i.e. apurinic/aprimidinic sites or baseless sugars, while the use of bacterial repair endonucleases enables detection of oxidized DNA bases (mainly 8-oxo-7,8-dihydroguanine (8-oxo-Gua)). In order to calculate the amount of oxidized DNA bases we simultaneously ran both the basic alkaline version of the comet assay (detects strand breaks and alkali-labile sites) and the same comet assay on cells incubated with a bacterial endonuclease (formamidopyrimidine DNA glycosylase; FPG). However, because the extent of DNA damage of FPG-incubated cells did not exceed the extent of DNA damage measured by the basic alkaline version of the assay, only the results obtained from the basic version of the assay appeared suitable for reporting [56].

DNA intactness in erythrocytes was evaluated according to the instructions in the Trevigen FLARE Assay kit manual, with slight changes in electrophoresis conditions. Briefly, immediately after sampling, 1  $\mu\text{L}$  of whole blood was serially diluted in PBS ( $\text{Ca}^{2+}$  and  $\text{Mg}^{2+}$  free) to reach a concentration of roughly  $1 \times 10^5$  cells/ml. 10  $\mu\text{L}$  of the obtained suspension was then mixed with 105  $\mu\text{L}$  of molten LMAgarose (1% low-melting agarose, Trevigen) and 50  $\mu\text{L}$  were immediately pipetted and evenly spread onto both wells of the comet slide. The slide was then incubated at 4°C in the dark for 60 min to accelerate gelling of the agarose disc and then transferred to prechilled lysis solution (Trevigen) with 10% DMSO for  $4 \pm 1$  (SD) h at 4°C. Next, the slides were washed three times for 10 min each in buffer (10 mM HEPES, 0.1 M KCl, 10 mM EDTA, 0.2 mg/ml bovine serum albumin, pH = 7.4) and then incubated in a humidity chamber at 37°C for between 30 and 45 min. For each slide, one well received 80  $\mu\text{L}$  buffer containing 28 U/mL bacterial formamidopyrimidine DNA glycosylase (FPG, Sigma F3174), while the same amount of plain buffer was pipetted into the other well. After incubation, a denaturation step was performed in alkali solution (300 mM NaOH, 1 mM EDTA, pH = 13) at room temperature for 20 min, in the dark. The slide was then transferred to a prechilled alkaline electrophoresis solution pH = 13 (300 mM NaOH, 1 mM EDTA) and subjected to electrophoresis at 1 V/cm for 5 min in the dark at room temperature. At the end of the electrophoresis, the slides were washed two times for 10 min with distilled water, immersed in 70% ethanol at room temperature for 5 min and air dried at 37°C. DNA was stained with 50  $\mu\text{L}$  of SYBR Green I dye (Trevigen, 1:10 000 in Tris-EDTA buffer, pH 7.5) for 20 min in the dark and immediately analyzed using an Olympus digital camera attached to an Olympus BX41 epifluorescence microscope.

For each slide well,  $82 \pm 25$  (SD) randomly chosen comets were analyzed using an Olympus BX41 epifluorescence microscope with an excitation filter of 470–490 nm and a barrier filter of 510–

550 nm. Fluorescent images of single cells were captured at 100 $\times$  magnification and images were scored for percentage of DNA in the tail using the Tritex CometScore™ Freeware v1.5 image analysis software. After scoring, the 30 most aberrant comets for each individual were excluded from the dataset. Repeatability of DNA damage (percentage of DNA in the tail in alkali-labile sites) was 0.85 ( $F_{56,2893} = 284$ ,  $P < 0.0001$ ). Repeatability of average DNA damage among microscopic fields was 0.87 ( $F_{115,231} = 20.4$ ,  $P < 0.0001$ ).

### Measurement of feather corticosterone

Wild-grown feathers (right outermost rectrix) were collected on day 8 of the experiment from each bird. Replacement feathers, grown during the experiment (lab-grown feathers) were collected on day 60, before the release of the birds. LPS/saline injections were performed 13 days after plucking the wild-grown feathers, when lab-grown replacement feathers were on average 8 mm long (13% of final length). Corticosterone from feathers was measured by radioimmunoassay (RIA) [57–59]. A methanol-based extraction technique was used to extract corticosterone from feathers. The calamus was removed and feather vanes minced into pieces of  $< 5 \text{ mm}^2$  with scissors. 10 mL of methanol (Sigma-Aldrich 34860N) was added and the samples placed in a sonicating water bath at room temperature for 30 min, followed by incubation at 50°C 300 rpm overnight in a shaker. The methanol was then separated from feather material by vacuum filtration, using #4 Whatman filter paper. The feather remnants, original sample vial and filtration material were washed with 3 mL of additional methanol; these washes were added to the original methanol extract. The methanol extract was placed in a 60°C water bath and subsequently evaporated in a fume hood under air. The extract residues were reconstituted in 0.55 ml PBS buffer (Sigma P4417) and frozen at -20°C until further analysis.

100  $\mu\text{L}$  of anti-corticosterone Sigma-Aldrich C8784 (stock solution diluted 1:100 in 0.05 M Tris-HCl, pH 8, 0.1 M NaCl, 0.1% BSA, 0.1% sodium azide buffer) and 100  $\mu\text{L}$  of tritiated ( $^3\text{H}$ ) corticosterone (Perkin Elmer, about 10000 cpm, in 0.05 M Tris-HCl, pH 8, 0.1 M NaCl, 0.1% BSA, 0.1% sodium azide buffer) were added to 200  $\mu\text{L}$  of sample in duplicates and then incubated at +4°C overnight. Subsequently, 0.5 ml of dextran coated charcoal suspension (0.5% dextran Sigma 31390, 0.5% charcoal Sigma-Aldrich C3345 in 0.05 M Tris-HCl, pH 8, 0.1 M NaCl, 0.1% BSA, 0.1% sodium azide buffer, 0°C on magnetic stirrer) was added. Samples were incubated at +4°C for 10 min then centrifuged at +4°C at 2000 g for 10 min. Supernatants were removed and 0.5 mL of supernatant was transferred to a scintillation tube; 5 mL of scintillation cocktail (Optiphase 'Hisafe' 3, Perkin Elmer, USA) was added and samples were read on a Perkin Elmer Precisely Liquid Scintillation Analyser Tri-Carb 2800TR with 18 s count time. The assay had a detectability limit of 50 pg per assay tube. Using duplicate methanol extract residues enabled us to assess the measurement precision of the RIA step of the analysis. Repeatability of total corticosterone concentration per feather was 0.69 ( $F_{104,105} = 5.4$ ,  $P < 0.0001$ ).

### Statistics

Pre-treatment values of studied variables were analysed using one-way ANOVA, with treatment as a single factor with four levels (LPS- FEAR-, LPS- FEAR+, LPS+ FEAR-, LPS+ FEAR+) in order to test for possible differences between treatment groups prior to the manipulations. Average parameter values per treatment group and ANOVA statistics are presented in Table S2. Treatment effects on changes in measured parameters between the first and second blood sampling were tested using

repeated measures ANOVA. Full models with both treatments (LPS and FEAR) and bird age (yearling vs older) as factors are presented in Table S3. Final models, containing only significant predictors (if any were found), are presented in Table 1. In the case of feather corticosterone, the first measurement represents the corticosterone content of wild-grown feathers while the second measurement represents the corticosterone content of lab-grown feathers. In the cases of DNA and protein damage and BA titres, only the effects of treatments on post-treatment values could be analyzed using ANOVA. The assumptions of parametric tests (normality of residuals, homogeneity of variances) were met for all models. All tests were two-tailed with an  $\alpha$ -level of 0.05. Sample sizes varied between analyses due to our inability to collect sufficient good quality blood samples from all birds.

## Results

None of the studied variables differed between treatment groups before the experimental manipulations (Table S2). Injection of LPS significantly increased plasma protein and erythrocyte

glutathione levels and one measure of plasma antioxidant capacity (OXY) (Table 1, Fig. 3). Compared with saline-injected birds, LPS-injected birds deposited less corticosterone into tail feathers grown during the experiment (Table 1, Fig. 4). None of the other measured haematological parameters were affected by the LPS injection (Table 1, Figs 3 – 4). LPS injection did not affect body mass dynamics between the first and second blood sampling (Table 1, Fig. 3). However, comparison of bird body mass at the time of the LPS or saline injection on day 21 and 72 h later on day 24 revealed a significantly greater decrease in LPS-injected ( $1.59 \pm 0.99$  (SD) g,  $n = 31$ ) than saline-injected birds ( $0.67 \pm 0.87$  (SD) g,  $n = 35$ ;  $t = 4.0$ ,  $P = 0.0002$ ). Exposure to the predator image and bird age did not affect any of the measured parameters (Table 1, Table S3).

## Discussion

### Effects of endotoxin on redox homeostasis

The primary aim of the current study was to establish the costs of inflammatory responses in terms of disruption to redox homeostasis and trade-offs with other components of immunity. Our assessment of the first component was partially successful, as we detected significant changes in two parameters related to redox status, i.e., erythrocyte glutathione levels and plasma OXY.

Glutathione (GSH) is the major endogenous antioxidant, participating directly in the neutralization of free radicals and recycling exogenous antioxidants such as vitamins C and E. GSH is a cofactor in GPx enzymes, which reduce  $H_2O_2$  and peroxidized fatty acid residues, and is involved in detoxification of xenobiotics and in many aspects of immunomodulation. It also plays a fundamental role in numerous metabolic and biochemical reactions, such as DNA synthesis and repair, regulation of apoptosis, protein synthesis, prostaglandin synthesis, amino acid transport and enzyme activation [54,60,61].

To our knowledge, this is the first study to detect an increase in glutathione in response to immune system activation in a wild bird species. Furthermore, despite the widespread practice of using LPS for induction of inflammation and OS in poultry, we were unable to find any studies where the effects of LPS on erythrocyte GSH had been measured. However, a reduction in the activity of the glutathione peroxidase (a GSH-dependent enzyme) in response to intravenous injection of *Salmonella enteritidis* LPS in the serum of chickens has been recorded [25]. The same study also detected a decrease in the activity of another antioxidant enzyme (superoxide dismutase) and an increase in plasma malondialdehyde (a marker of lipid peroxidation) in the serum of LPS-injected chickens. In Fischer rats, *S. enteritidis*, LPS dose dependently increased plasma GSH [62]. In another study of rats, a significant increase in liver and plasma total GSH was observed 5 h after endotoxin treatment (acute phase), followed by a decrease of these parameters below control values at 48 h (recovery phase) [63]. These findings support the hypothesis that increased erythrocyte GSH levels in the current study reflect the compensatory up-regulation of GSH synthesis among immune-challenged birds.

Another parameter related to redox homeostasis that was sensitive to LPS treatment was plasma OXY. We are aware of four previous studies where this marker has been measured in relation to immune challenge. In Eurasian kestrel (*Falco tinnunculus*) nestlings, immunostimulation with a plant lectin phytohaemagglutinin (PHA) reduced serum OXY levels over 24 h [64]. Diamond doves (*Geopelia gumerata*), immunised with sheep erythrocytes also had significantly lower plasma OXY six days after immunisation, when primary antibody production reaches its maximum [65]. Similarly, a non-significant tendency ( $P = 0.08$ ) for

**Table 1.** Effects of LPS and predator image exposure (FEAR) treatments on changes (or final values) of physiological parameters of captive greenfinches between the 15<sup>th</sup> and 23<sup>rd</sup> day of experiment.

| Dependent variable                | Predictor | F      | df   | P       |
|-----------------------------------|-----------|--------|------|---------|
| Mass                              | TIME      | 236.34 | 1,65 | <0.0001 |
| Total plasma protein              | LPS       | 21.78  | 1,32 | 0.0001  |
|                                   | TIME      | 50.58  | 1,32 | <0.0001 |
|                                   | TIME*LPS  | 17.84  | 1,32 | 0.0002  |
| Glutathione                       | LPS       | 0.01   | 1,57 | <0.0001 |
|                                   | TIME      | 27.29  | 1,57 | <0.0001 |
|                                   | TIME*LPS  | 13.04  | 1,57 | 0.0006  |
| TAC                               | TIME      | 0.66   | 1,33 | 0.42    |
| OXY                               | LPS       | 5.74   | 1,22 | 0.026   |
|                                   | TIME      | 11.96  | 1,22 | 0.002   |
|                                   | TIME*LPS  | 13.64  | 1,22 | 0.001   |
| Uric acid                         | TIME      | 0.17   | 1,34 | 0.69    |
| Feather corticosterone            | TIME      | 6.67   | 1,50 | 0.013   |
|                                   | TIME*LPS  | 6.25   | 1,50 | 0.016   |
| DNA damage                        | LPS       | 0.08   | 1,52 | 0.78    |
|                                   | FEAR      | 1.89   | 1,52 | 0.18    |
|                                   | LPS*FEAR  | 0.58   | 1,52 | 0.45    |
| Carbonylated proteins             | LPS       | 0.39   | 1,22 | 0.54    |
|                                   | FEAR      | 2.08   | 1,22 | 0.16    |
|                                   | LPS*FEAR  | 1.59   | 1,22 | 0.22    |
| Oocyst count                      | TIME      | 2.19   | 1,65 | 0.14    |
| <i>B. abortus</i> antibody titres | LPS       | 0.48   | 1,52 | 0.49    |
|                                   | FEAR      | 0.16   | 1,52 | 0.69    |
|                                   | LPS*FEAR  | <0.001 | 1,52 | 0.96    |

For DNA damage and carbonylated proteins, only final values measured on day 23 of the experiment are analysed with ANOVAs. For the *B. abortus* antibody titres, values measured on day 31 are analysed with ANOVA. For the rest of variables, pre- vs post-treatment values are analysed in repeated measures ANOVA-s with TIME as a repeated measure (pre- vs post-treatment change). For repeated measures models, only significant effects (if present) are given. Full repeated measures models are presented in Table S3.

doi:10.1371/journal.pone.0067545.t001

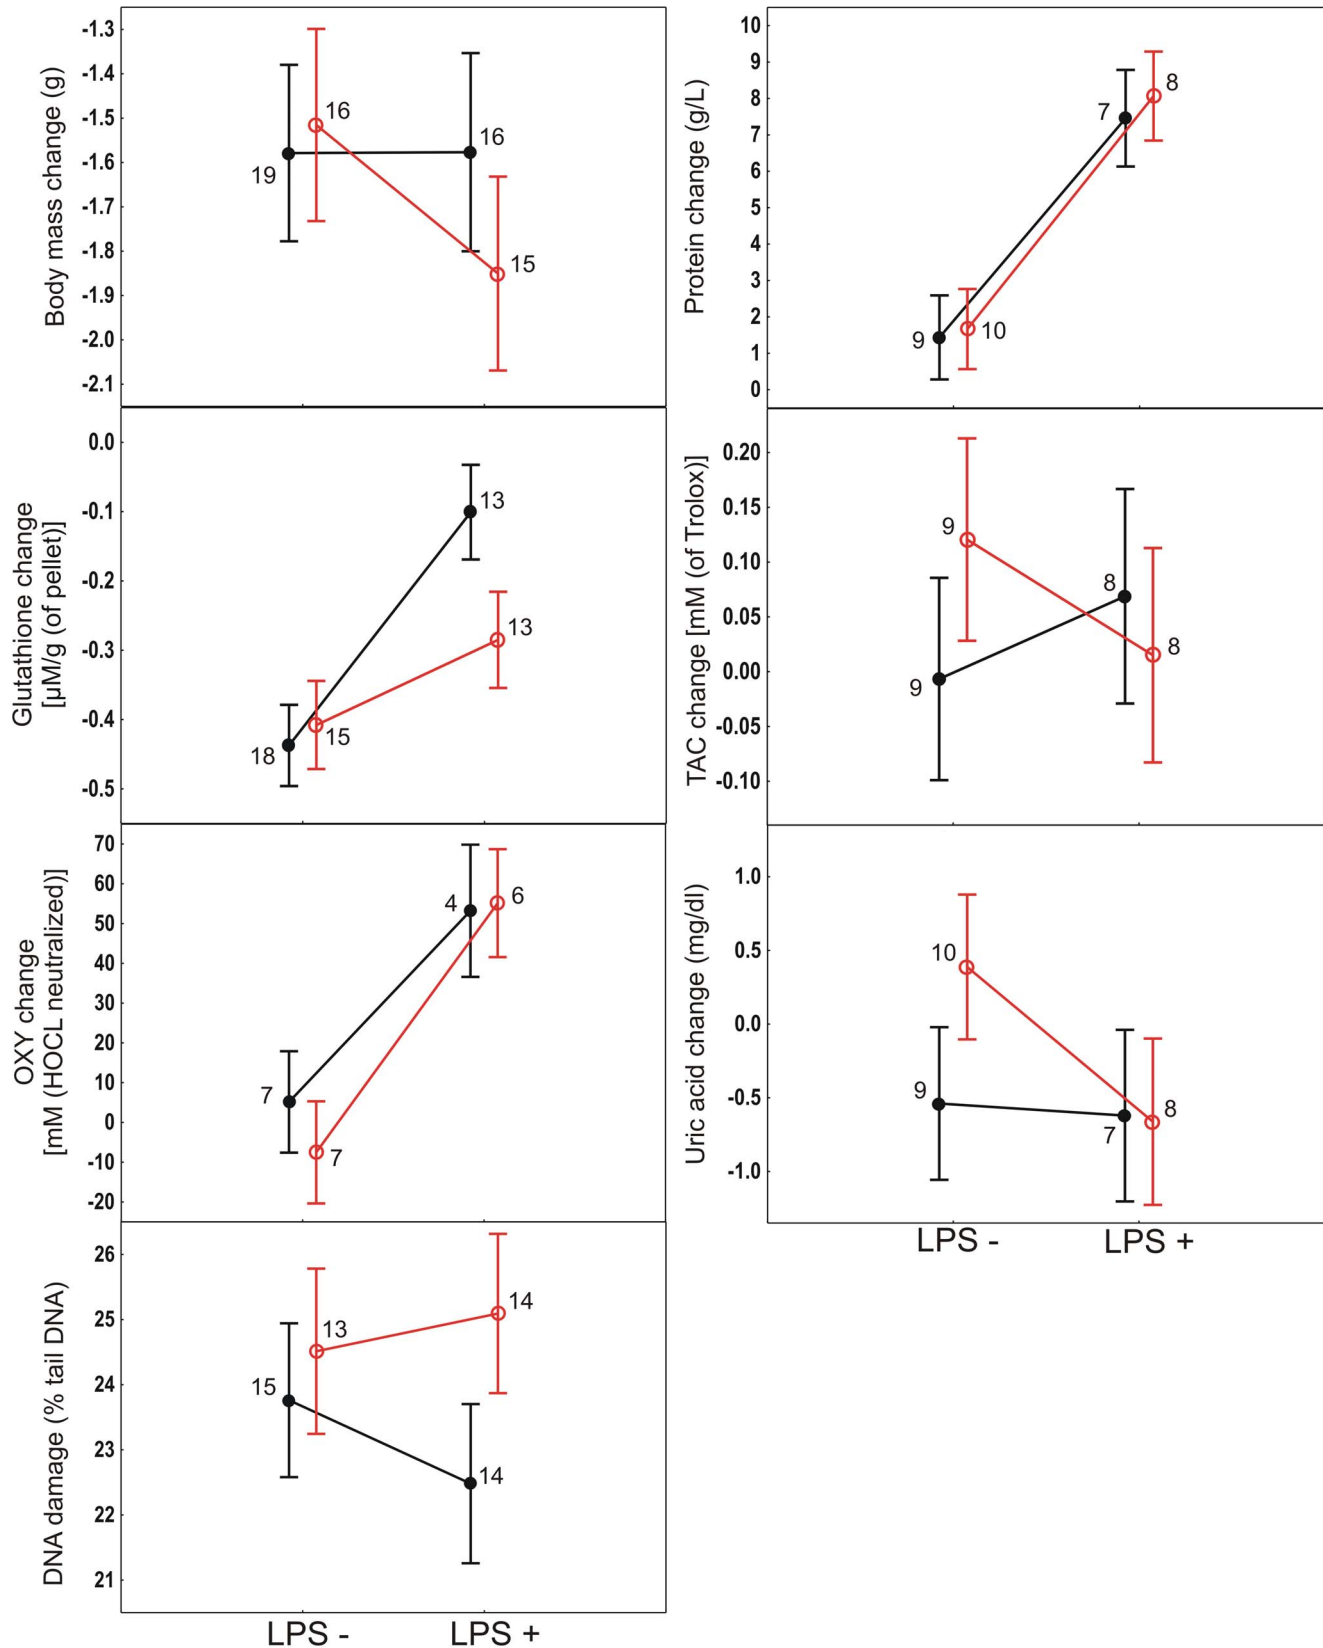

**Figure 3. Average ± SE changes in physiological variables between the 15<sup>th</sup> and 23<sup>rd</sup> day of the experiment among the LPS-injected ('LPS +') and saline-injected ('LPS -') greenfinches.** Filled symbols represent birds not exposed to a predator image, open symbols represent birds exposed to a predator image. Numbers indicate sample sizes for respective treatment groups. doi:10.1371/journal.pone.0067545.g003

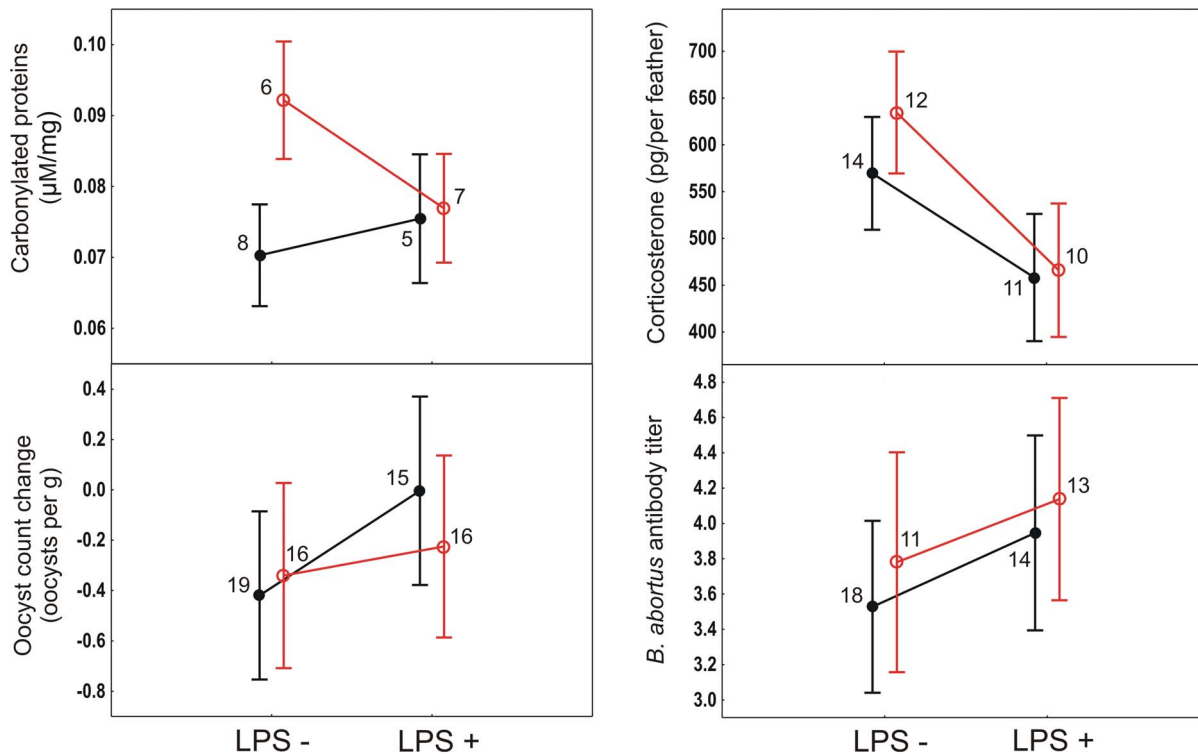

**Figure 4. Average  $\pm$  SE changes in coccidian oocyst load in greenfinch faecal samples between the pre-treatment and post-treatment period, protein carbonyls on the 15<sup>th</sup> day of the experiment, BA antibody titre and corticosterone content of feathers grown during the experiment.** Legend as in Fig. 3.  
doi:10.1371/journal.pone.0067545.g004

reduced OXY was detected in a study of homing pigeons (*Columba livia*) 18 h after LPS injection [66], while LPS injection had no effect on plasma OXY in the nestlings of European starlings (*Sturnus vulgaris*) over 24 h [26]. Our results are in contrast with the above findings. We suggest that one of the reasons for this discrepancy might be the timing of blood sampling with respect to immunisation. In the current study, birds were bled ca 38 h after LPS injection, which is a longer interval than those used in the above-cited studies. It thus appears possible that the results obtained in the current study characterise the phase of compensatory up-regulation of antioxidant protection mechanisms that follows initial production of pro-oxidant compounds when inflammatory response is initiated (see also [66]).

The lack of an effect of LPS injection on plasma TAC and uric acid is consistent with the results of Cohen and colleagues [67], obtained from domestic chickens (sampled at 2, 7, 12 and 14 h PI). Another study in chickens, however, detected a decrease in plasma uric acid levels two days after LPS injection [68].

We are not aware of previous studies measuring DNA or protein damage in response to LPS administration in birds. In mice, LPS injection can increase carbonylation of plasma proteins [69]. It is possible that carbonylated proteins of avian erythrocytes are not a sufficiently sensitive marker to detect oxidative damage. For instance, we also failed to detect an increase in protein carbonyls in response to paraquat-induced OS in greenfinches [70]. The absence of effects of LPS on DNA damage in the current study could possibly be ascribed to our inability to measure oxidized purines, as the current version of the assay quantifies DNA strand breaks and alkali-labile sites only. These parameters cannot be specifically related to oxidation, since they result from various forms of damage, and might also represent intermediates

in the repair process [56]. It should be noted, however, that a similar alkaline comet assay was able to detect a relationship between DNA damage, ornamentation and survival in common yellowthroats (*Geothlypis trichas*) [71]. In budgerigars (*Melopsittacus undulatus*), a similar assay revealed that a diet based on reduced levels of antioxidants led to increased DNA damage [72]. It is thus plausible that the absence of effects of LPS on our markers of oxidative damage was genuine or that the 38 h interval between the LPS injection and blood sampling was too long for detection of rapid and transient changes in oxidative damage. In the context of findings that LPS injection affects body mass for at least 72 h PI and plasma total protein content 38 h PI, one could conclude that DNA integrity is well protected from such inflammatory insults. Alternatively, quick repair of DNA may be highly prioritized as compared to restoration of body mass, removal of positive acute phase proteins from blood or restoration of blood volume (if increased protein levels result from a fever-induced dehydration [26]).

#### Endotoxin, corticosterone and immune function

Perhaps the most surprising result of the current study was that LPS-injected birds deposited less corticosterone into their feathers during the experiment than saline-injected birds. Both the acute phase response and avian stress response share some of the same neuroendocrine control mechanisms, such as the HPA-axis [39], and endotoxin has been referred to as an 'immunological stressor' [37,41]. Indeed, LPS administration experiments typically document a rise in blood corticosterone levels, lasting from minutes to several hours following injection [39] but see [44].

Feather corticosterone reflects plasma hormone levels during the period of feather growth and thus integrates variation in the

baseline level, the magnitude of the stimulated response, the time course for the stress response and the number of stressors experienced [57,58]. We therefore expected that the LPS-induced surge of corticosterone would be reflected in higher feather corticosterone levels among LPS-treated birds. However, exactly the opposite was found. A possible explanation for such a result could be stress-induced downregulation of corticosterone production due to a negative feedback mechanism (reviewed by [73]). For instance, chronic psychological stress [74], feather clipping [75] and corticosterone administration [76] have been shown to suppress baseline and/or stress-induced corticosterone levels in birds. Such down-regulation of the endogenous stress response can be relatively long-lasting; for example, up to 20 days in kestrel *Falco tinnunculus* nestlings [76]. The adaptive explanation for this phenomenon would be protection of an organism from the pathological effects (immune suppression, energy dysregulation, neuronal cell death, behavioural impairment) of chronically elevated corticosterone levels [73,77].

We are unaware of any study reporting long-lasting effects of LPS administration on the functionality of the HPA-axis. However, we cannot currently provide any alternative explanation for the reduced feather corticosterone of LPS-injected birds besides deactivation, impairment or down-regulation of corticosterone secretion cascade due to the endotoxin-induced immune response. Long-lasting consequences of inflammatory responses have also been recorded in a previous study of greenfinches, where heterophil concentration (a haematological index of stress and/or inflammation) remained elevated for at least 30 days after administration of phytohaemagglutinin [78]. We propose that activation of the immune system with pro-inflammatory antigens can induce long-lasting changes in the functionality of the HPA axis that resemble the effects of chronic stress and eventually affect the stress responsiveness of birds. This hypothesis would be testable by measuring feather corticosterone levels subsequent to up- and down-regulation of HPA axis activity and long-term responses to different antigens.

None of the treatments affected the antibody response to *Brucella abortus* antigen injection. In mammals, antibodies produced against BA are predominantly IgG2a, which are characteristic of Th1-cell mediated (i.e. inflammatory) immune responses [79]. Assuming a similar mechanism in birds, high antibody titres can be interpreted as strong inducers of Th1 helper cell mediated immunity. Th1 type immune responses are typically down-regulated by the major stress hormones, i.e., glucocorticoids and catecholamines [10,80]. This scenario was confirmed in previous studies in greenfinches [81] and great tits (*Parus major*) [82], which indicated that BA antibody titres are lower in stressed individuals. The lack of an effect of predator image exposure on immune response to BA in the current study can probably be explained by the generally mild nature of this treatment (see below). However, we lack an explanation of why BA antibody titres were not affected by LPS administration.

Similarly to the BA-response, we found no evidence that our treatments affected the intensity of chronic coccidiosis. A possible explanation for this pattern could be tolerance of greenfinches to their naturally acquired coccidian strains [46], which would be manifested by maintenance of immune responses against chronic infection at a low level, such that these are not sensitive to external manipulations of the immune system. Similarly, intensity of chronic coccidiosis was unaffected by immune challenge with sheep erythrocytes [18]. However, injection of an inflammatory agent, phytohaemagglutinin, was found to suppress the intensity of chronic coccidiosis, but only among the carotenoid-supplemented

greenfinches [83]. Hence, interactions between processes affecting novel challenges and resistance to chronic infections appear complex.

### Effects of predator image exposure

Contrary to our predictions, we did not find any evidence that exposing birds to the image of a predator amplified the effects of physiological stress induced by endotoxin. We had reason to expect a physiological impact of predator image exposure because long-term effects of stressful events, such as capture [84], nest predation [27], translocation [85], restraint [86] or high stocking density [30], on different behavioural and physiological parameters have been recorded in birds. Furthermore, we detected that exposure to a predator image reduced total locomotor activity in greenfinches for at least 44 h after the treatment [87]. On the other hand, predator image exposure (unlike endotoxin) had no effect on deposition of corticosterone into feathers grown during the experiment. The latter finding implies that our treatment had a relatively mild stressful impact.

### Conclusions

This experiment demonstrated up-regulation of two markers of antioxidant protection – erythrocyte glutathione and plasma OXY in response to immune challenge with bacterial endotoxin. These findings suggest that inflammatory responses alter redox homeostasis. It is possible that such up-regulation of antioxidant protection *per se* is costly in terms of some ecologically relevant currency [60,70], as otherwise it would be difficult to explain why animals do not permanently maintain high levels of GSH and plasma antioxidants. Establishing such potential costs of up-regulation of antioxidant protection machinery is a challenge for future studies in the realm of oxidative stress ecology.

### Supporting Information

**Table S1 Number of greenfinches subjected to FEAR and LPS treatments with respect to age (yearling vs older).**

(DOC)

**Table S2 Average pre-treatment values of physiological parameters of captive greenfinches injected with LPS or exposed to predator image.**

(DOC)

**Table S3 Effects of LPS and predator image exposure treatments and age of birds on changes of physiological parameters of captive greenfinches between the 15<sup>th</sup> and 23<sup>rd</sup> day of experiment in repeated measures ANOVA-s.**

(DOC)

### Acknowledgments

We thank Pirkko Jalakas, Janek Urvik and Martin Pent for help with bird maintenance and experiments and Rita Hõrak for help with logistics. Two anonymous reviewers provided constructive criticism on the manuscript. John Davison kindly revised the language.

### Author Contributions

Conceived and designed the experiments: PH RM MM. Performed the experiments: RM MM ES M-AL TS UK PH. Analyzed the data: RM MM ES M-AL PH. Contributed reagents/materials/analysis tools: PH. Wrote the paper: RM MM PH.



## References

- Demas GE, Nelson RJ (2011) *Ecoimmunology*. New York: Oxford University Press.
- Sheldon BC, Verhulst S (1996) Ecological immunology: costly parasite defences and trade-offs in evolutionary ecology. *Trends in Ecology & Evolution* 11: 317–321.
- Graham AL, Shuker DM, Pollitt LC, Auld SKJR, Wilson AJ, et al. (2011) Fitness consequences of immune responses: strengthening the empirical framework for ecoimmunology. *Functional Ecology* 25: 5–17.
- French SS, Moore MC, Demas GE (2009) Ecological immunology: The organism in context. *Integrative and Comparative Biology* 49: 246–253.
- Lee KA (2006) Linking immune defenses and life history at the levels of the individual and the species. *Integrative and Comparative Biology* 46: 1000–1015.
- Sorci G, Faivre B (2009) Review. Inflammation and oxidative stress in vertebrate host–parasite systems. *Philosophical Transactions of the Royal Society B: Biological Sciences* 364: 71–83.
- Klasing KC (2004) The cost of immunity. *Acta Zoologica Sinica* 50: 961–969.
- Lochmiller RL, Deerenberg C (2000) Trade-offs in evolutionary immunology: just what is the cost of immunity? *Oikos* 88: 87–98.
- Graham AL, Allen JE, Read AF (2005) Evolutionary causes and consequences of immunopathology. *Annual Review of Ecology and Systematics* 36: 373–397.
- Ardia DR, Parmentier HK, Vogel LA (2011) The role of constraints and limitation in driving individual variation in immune response. *Functional Ecology* 25: 61–73.
- Graham AL (2002) When T-Helper Cells Don't Help: Immunopathology During Concomitant Infection. *The Quarterly Review of Biology* 77: 409–434.
- Pursall ER, Rolff J (2012) Immunopathology in ecological immunology. In: Demas GE, Nelson AC, editors. *Ecoimmunology*. Oxford; New York: Oxford University Press. pp. 530–547.
- Sies H, Jones DP (2007) Oxidative stress. In: Fink G, editor. *Encyclopaedia of stress*. San Diego, CA: Elsevier. pp. 45–48.
- Costantini D (2008) Oxidative stress in ecology and evolution: lessons from avian studies. *Ecology Letters* 11: 1238–1251.
- Bradley JE, Jackson JA (2008) Measuring immune system variation to help understand host-pathogen community dynamics. *Parasitology* 135: 807–823.
- Degen WGJ, Van Daal N, Rothwell L, Kaiser P, Schijns VEJC (2005) Th1/Th2 polarization by viral and helminth infection in birds. *Veterinary Microbiology* 105: 163–167.
- Parmentier HK, Van Den Kieboom WJ, Nieuwland MG, De Vries Reilingh G, Hangalapura BN, et al. (2004) Differential effects of lipopolysaccharide and lipoteichoic acid on the primary antibody response to keyhole limpet hemocyanin of chickens selected for high or low antibody responses to sheep red blood cells. *Poultry Science* 83: 1133–1139.
- Hörak P, Zilmer M, Saks L, Ots I, Karu U, et al. (2006) Antioxidant protection, carotenoids, and the costs of immune challenge in greenfinches. *Journal of Experimental Biology* 209: 4329–4338.
- Fair JM, Hansen ES, Ricklefs RE (1999) Growth, developmental stability and immune response in juvenile Japanese quails (*Coturnix coturnix japonica*). *Proceedings of the Royal Society of London, Series B: Biological Sciences* 266: 1735–1742.
- Baze MM, Hunter K, Hayes JP (2011) Chronic hypoxia stimulates an enhanced response to immune challenge without evidence of an energetic tradeoff. *The Journal of Experimental Biology* 214: 3255–3268.
- Martin LB (2009) Stress and immunity in wild vertebrates: Timing is everything. *General and Comparative Endocrinology* 163: 70–76.
- Dhabhar FS, McEwen BS (1997) Acute stress enhances while chronic stress suppresses cell-mediated immunity in vivo: A potential role for leukocyte trafficking. *Brain Behavior and Immunity* 11: 286–306.
- Seegerstrom SC (2007) Stress, energy, and immunity: An ecological view. *Current Directions in Psychological Science* 16: 326–330.
- Miller GE, Cohen S, Ritchey AK (2002) Chronic psychological stress and the regulation of pro-inflammatory cytokines: A glucocorticoid-resistance model. *Health Psychology* 21: 531–541.
- Zhang HJ, Tian YD, Guo YM, Yuan JM (2008) Dietary conjugated linoleic acid improves antioxidant capacity in broiler chicks. *British Poultry Science* 49: 213–221.
- Serra L, Pirrello S, Caprioli M, Griggio M, Andreotti A, et al. (2012) Seasonal decline of offspring quality in the European starling *Sturnus vulgaris*: An immune challenge experiment. *Behavioral Ecology and Sociobiology* 66: 697–709.
- Travers M, Clinchy M, Zanette L, Boonstra R, Williams TD (2010) Indirect predator effects on clutch size and the cost of egg production. *Ecology Letters* 13: 980–988.
- Costantini D, Marasco V, Møller AP (2011) A meta-analysis of glucocorticoids as modulators of oxidative stress in vertebrates. *Journal of Comparative Physiology B-Biochemical Systemic and Environmental Physiology* 181: 447–456.
- Zhang WH, Gao F, Zhu QF, Li C, Jiang Y, et al. (2011) Dietary sodium butyrate alleviates the oxidative stress induced by corticosterone exposure and improves meat quality in broiler chickens. *Poultry Science* 90: 2592–2599.
- Sohn S, Subramani V, Moon Y, Jang I (2012) Telomeric DNA quantity, DNA damage, and heat shock protein gene expression as physiological stress markers in chickens. *Poultry Science* 91: 829–836.
- Prior RL, Cao G (1999) In vivo total antioxidant capacity: comparison of different analytical methods. *Free Radical Biology & Medicine* 27: 1173–1181.
- Costantini D, Metcalfe NB, Monaghan P (2010) Ecological processes in a hormetic framework. *Ecology Letters* 13: 1435–1447.
- Martin LB, Weil ZM, Kuhlman JR, Nelson RJ (2006) Trade-offs within the immune systems of female White-footed Mice, *Peromyscus leucopus*. *Functional Ecology* 20: 630–636.
- Gasparini J, Pialut R, Bize P, Roulin A (2009) Synergistic and antagonistic interaction between different branches of the immune system is related to melanin-based coloration in nestling tawny owls. *Journal of Evolutionary Biology* 22: 2348–2353.
- Saks L, Karu U, Ots I, Hörak P (2006) Do standard measures of immunocompetence reflect parasite resistance? The case of greenfinch coccidiosis. *Functional Ecology* 20: 75–82.
- Mireles AJ, Kim SM, Klasing KC (2005) An acute inflammatory response alters bone homeostasis, body composition, and the humoral immune response of broiler chickens. *Poultry Science* 84: 553–560.
- Xie H, Rath N, Huff G, Huff W, Balog J (2000) Effects of Salmonella typhimurium lipopolysaccharide on broiler chickens. *Poultry Science* 79: 33–40.
- Abu-El-Saad AASA (2007) Immunomodulating effect of inositol hexaphosphate against *Aeromonas hydrophila* endotoxin. *Immunobiology* 212: 179–192.
- Owen-Ashley N, Wingfield J (2007) Acute phase responses of passerine birds: characterization and seasonal variation. *Journal of Ornithology* 148 Supplement 2: 583–591.
- Owen-Ashley NT, Turner M, Hahn TP, Wingfield JC (2006) Hormonal, behavioral, and thermoregulatory responses to bacterial lipopolysaccharide in captive and free-living white-crowned sparrows (*Zonotrichia leucophrys gambelii*). *Hormones and Behavior* 49: 15–29.
- Laugero KD, Moberg GP (2000) Summation of behavioral and immunological stress: metabolic consequences to the growing mouse. *American Journal of Physiology-Endocrinology and Metabolism* 279: E44–E49.
- Löhmus M, Sild E, Hörak P, Björklund M (2011) Effects of chronic leptin administration on nitric oxide production and immune responsiveness of greenfinches. *Comparative Biochemistry and Physiology - A Molecular and Integrative Physiology* 158: 560–565.
- Cote J, Arnoux E, Sorci G, Gaillard M, Faivre B (2010) Age-dependent allocation of carotenoids to coloration versus antioxidant defences. *Journal of Experimental Biology* 213: 271–277.
- Martin LB, Kidd L, Liebl AL, Coon CAC (2011) Captivity induces hyperinflammation in the house sparrow (*Passer domesticus*). *The Journal of Experimental Biology* 214: 2579–2585.
- Hampton RR (1994) Sensitivity to information specifying the line of gaze of humans in sparrows (*Passer domesticus*). *Behaviour*: 41–51.
- Hörak P, Saks L, Karu T, Ots I (2006) Host resistance and parasite virulence in greenfinch coccidiosis. *Journal of Evolutionary Biology* 19: 277–288.
- Hörak P, Saks L, Karu U, Ots I, Surai PF, et al. (2004) How coccidian parasites affect health and appearance of greenfinches. *Journal of Animal Ecology* 73: 935–947.
- Erel O (2004) A novel automated direct measurement method for total antioxidant capacity using a new generation, more stable ABTS radical cation. *Clinical Biochemistry* 37: 277–285.
- Sepp T, Sild E, Hörak P (2010) Hematological Condition Indexes in Greenfinches: Effects of Captivity and Diurnal Variation. *Physiological and Biochemical Zoology* 83: 276–282.
- Costantini D (2010) On the measurement of circulating antioxidant capacity and the nightmare of uric acid. *Methods in Ecology and Evolution* 2: 321–325.
- Sepp T, Sild E, Blount JD, Männiste M, Karu U, et al. (2012) Individual consistency and covariation of measures of oxidative status in greenfinches. *Physiological and Biochemical Zoology* 85: 299–307.
- Galván I, Alonso-Alvarez C (2008) An Intracellular Antioxidant Determines the Expression of a Melanin-Based Signal in a Bird. *PLoS ONE* 3: e3335.
- Rahman I, Kode A, Biswas SK (2007) Assay for quantitative determination of glutathione and glutathione disulfide levels using enzymatic recycling method. *Nat Protocols* 1: 3159–3165.
- Hörak P, Sild E, Soomets U, Sepp T, Kilk K (2010) Oxidative stress and information content of black and yellow plumage coloration: an experiment with greenfinches. *Journal of Experimental Biology* 213: 2225–2233.
- Quijco D, Habibudeh M, Daylmatoli H, Rezvani T (2005) Malondialdehyde and carbonyl contents in the erythrocytes of streptozotocin-induced diabetic rats. *International Journal of Diabetes and Metabolism* 13: 96–98.
- Collins AR (2009) Investigating oxidative DNA damage and its repair using the comet assay. *Mutation Research/Reviews in Mutation Research* 681: 24–32.
- Lattin CR, Reed JM, DesRochers DW, Romero LM (2011) Elevated corticosterone in feathers correlates with corticosterone-induced decreased feather quality: a validation study. *Journal of Avian Biology* 42: 247–252.
- Bortolotti GR, Marchant TA, Blas J, German T (2008) Corticosterone in feathers is a long-term, integrated measure of avian stress physiology. *Functional Ecology* 22: 494–500.

59. Wingfield JC, Vleck CM, Moore MC (1992) Seasonal changes of the adrenocortical response to stress in birds of the Sonoran desert. *Journal of Experimental Zoology* 264: 419–428.
60. Isaksson C, Sheldon BC, Uller T (2011) The Challenges of Integrating Oxidative Stress into Life-History Biology. *BioScience* 61: 194–202.
61. Halliwell B, Gutteridge JMC (2007) *Free radicals in Biology and Medicine*. Oxford: Oxford University Press.
62. Jaeschke H (1992) Enhanced sinusoidal glutathione efflux during endotoxin-induced oxidant stress in vivo. *American Journal of Physiology-Gastrointestinal and Liver Physiology* 263: G60-G68.
63. Portolés MT, Catalá M, Antón A, Pagani R (1996) Hepatic response to the oxidative stress induced by *E. coli* endotoxin: Glutathione as an index of the acute phase during the endotoxic shock. *Molecular and Cellular Biochemistry* 159: 115–121.
64. Costantini D, Dell’Omo G (2006) Effects of T-cell-mediated immune response on avian oxidative stress. *Comparative Biochemistry and Physiology - Part A: Molecular & Integrative Physiology* 145: 137–142.
65. Casagrande S, Costantini D, Groothuis TGG (2012) Interaction between sexual steroids and immune response in affecting oxidative status of birds. *Comparative Biochemistry and Physiology - A Molecular and Integrative Physiology* 163: 296–301.
66. van de Crommenacker J, Horrocks NPC, Versteegh MA, Komdeur J, Tieleman BI, et al. (2010) Effects of immune supplementation and immune challenge on oxidative status and physiology in a model bird: implications for ecologists. *J Exp Biol* 213: 3527–3535.
67. Cohen A, Klasing K, Ricklefs R (2007) Measuring circulating antioxidants in wild birds. *Comparative Biochemistry and Physiology Part B: Biochemistry and Molecular Biology* 147: 110–121.
68. Star L, Decuyper E, Parmentier HK, Kemp B (2008) Effect of single or combined climatic and hygienic stress in four layer lines. 2. Endocrine and oxidative stress responses. *Poultry Science* 87: 1031–1038.
69. Sompamit K, Kukongviriyapan U, Nakmareong S, Pannangpetch P, Kukongviriyapan V (2009) Curcumin improves vascular function and alleviates oxidative stress in non-lethal lipopolysaccharide-induced endotoxaemia in mice. *European journal of pharmacology* 616: 192–199.
70. Meitern R, Sild E, Kilk K, Porosk R, Hörak P (2013) On the methodological limitations of detecting oxidative stress: effects of paraquat on measures of oxidative status in greenfinches. *Journal of Experimental Biology* 216: in press. doi: 10.1242/jeb.087528
71. Freeman-Gallant CR, Amidon J, Berdy B, Wein S, Taff CC, et al. (2011) Oxidative damage to DNA related to survivorship and carotenoid-based sexual ornamentation in the common yellowthroat. *Biology Letters* 7: 429–432.
72. Larcombe SD, Tregaskes CA, Coffey JS, Stevenson AE, Alexander L, et al. (2008) The effects of short-term antioxidant supplementation on oxidative stress and flight performance in adult budgerigars *Melopsittacus undulatus*. *Journal of Experimental Biology* 211: 2859–2864.
73. Goutte A, Angelier F, Welcker J, Moe B, Clement-Chastel C, et al. (2010) Long-term survival effect of corticosterone manipulation in Black-legged kittiwakes. *General and Comparative Endocrinology* 167: 246–251.
74. Cyr NE, Earle K, Tam C, Romero LM (2007) The effect of chronic psychological stress on corticosterone, plasma metabolites, and immune responsiveness in European starlings. *General and Comparative Endocrinology* 154: 59–66.
75. Patterson SH, Winkler DW, Breuner CW (2011) Glucocorticoids, individual quality and reproductive investment in a passerine bird. *Animal Behaviour* 81: 1239–1247.
76. Müller C, Almasi B, Roulin A, Breuner CW, Jenni-Eiermann S, et al. (2009) Effects of corticosterone pellets on baseline and stress-induced corticosterone and corticosteroid-binding-globulin. *General and Comparative Endocrinology* 160: 59–66.
77. Cyr NE, Romero LM (2009) Identifying hormonal habituation in field studies of stress. *General and Comparative Endocrinology* 161: 295–303.
78. Sarv T, Hörak P (2009) Phytohaemagglutinin injection has a long-lasting effect on immune cells. *Journal of Avian Biology* 40: 569–571.
79. Khatun M, Islam A, Baek BK, Sung IL (2009) Characteristics of the immune response during acute brucellosis in Sprague-Dawley rats. *Journal of Infection in Developing Countries* 3: 392–397.
80. Sapolsky RM, Romero LM, Munck AU (2000) How do glucocorticoids influence stress responses? Integrating permissive, suppressive, stimulatory, and preparative actions. *Endocrine Reviews* 21: 55–89.
81. Sild E, Sepp T, Hörak P (2011) Behavioural trait covaries with immune responsiveness in a wild passerine. *Brain Behavior and Immunity* 25: 1349–1354.
82. Krams I, Vrublevska J, Cirule D, Kivleniece I, Krama T, et al. (2012) Heterophil/lymphocyte ratios predict the magnitude of humoral immune response to a novel antigen in great tits (*Parus major*). *Comparative Biochemistry and Physiology - Part A: Molecular & Integrative Physiology* 161: 422–428.
83. Sepp T, Karu U, Sild E, Männiste M, Hörak P (2011) Effects of carotenoids, immune activation and immune suppression on the intensity of chronic coccidiosis in greenfinches. *Experimental Parasitology* 127: 651–657.
84. van Oers K, Carere C (2007) Long-term effects of repeated handling and bleeding in wild caught Great Tits *Parus major*. *Journal of Ornithology* 148: 185–190.
85. Dickens MJ, Delehanty DJ, Romero LM (2009) Stress and translocation: alterations in the stress physiology of translocated birds. *Proceedings of the Royal Society B-Biological Sciences* 276: 2051–2056.
86. Lynn SE, Prince LE, Phillips MM (2010) A single exposure to an acute stressor has lasting consequences for the hypothalamo-pituitary-adrenal response to stress in free-living birds. *General and Comparative Endocrinology* 165: 337–344.
87. Männiste M, Sepp T, Hörak P (2013) Locomotor activity of captive greenfinches involves two different behavioural traits. *Ethology*: 119 in press. doi: 10.1111/eth.12099
